# Supplementary material
Source: PubMed Central journal article supplement (PMC3710362)
Supplement: rna-10-564-s01.pdf [file rna-10-564-s01.pdf]

## **Supplemental Material to:**

**Rashmi U. Pathak, Anitha Mamillapalli, Nandini Rangaraj,  
Ram P. Kumar, Vsanthi Dasari, Krishnaveni Mishra  
and Rakesh K. Mishra**

**AAGAG repeat RNA is an essential  
component of nuclear matrix in *Drosophila***

**2013; 10(4)**

**<http://dx.doi.org/10.4161/rna.24326>**

**[www.landesbioscience.com/journals/rnabiology/article/24326/](http://www.landesbioscience.com/journals/rnabiology/article/24326/)**

**Figure S1**

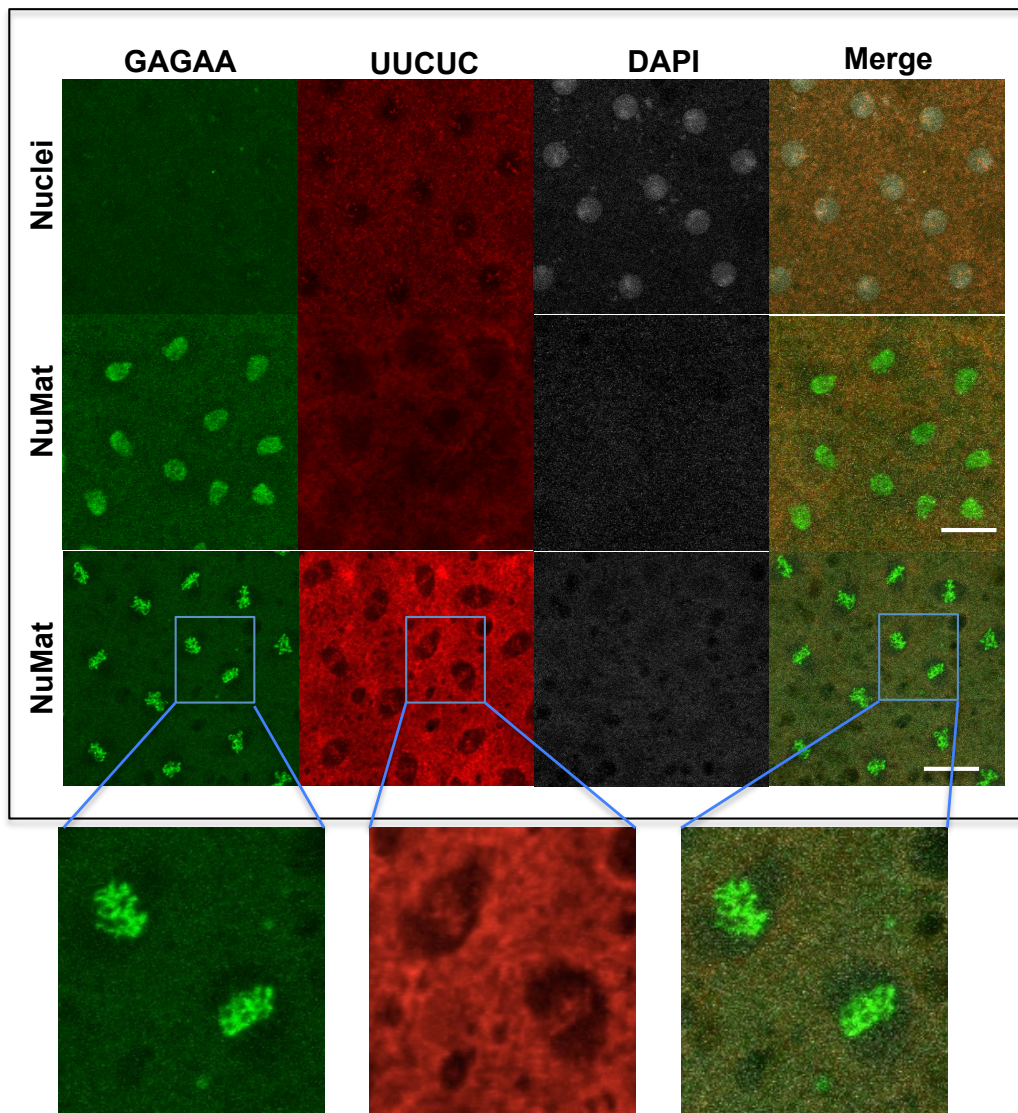

**Distribution of AAGAG/CUCUU transcripts in syncytial embryo –** RNA-FISH shows that in intact embryonic nuclei, AAGAG and CUCUU transcripts are not detectable as they are concealed beneath the chromatin. In embryos with *in situ* NuMat preparation, AAGAG transcripts are associated with interphase NuMat as well as mitotic chromosome scaffold. CUCUU transcripts are seen to associate with chromosomal scaffold but are absent in interphase NuMat. Lower panel shows enlarged part to emphasize the presence of CUCUU transcript in the mitotic chromosomes. Scale Bar – 10  $\mu$ m.

**Figure S2**

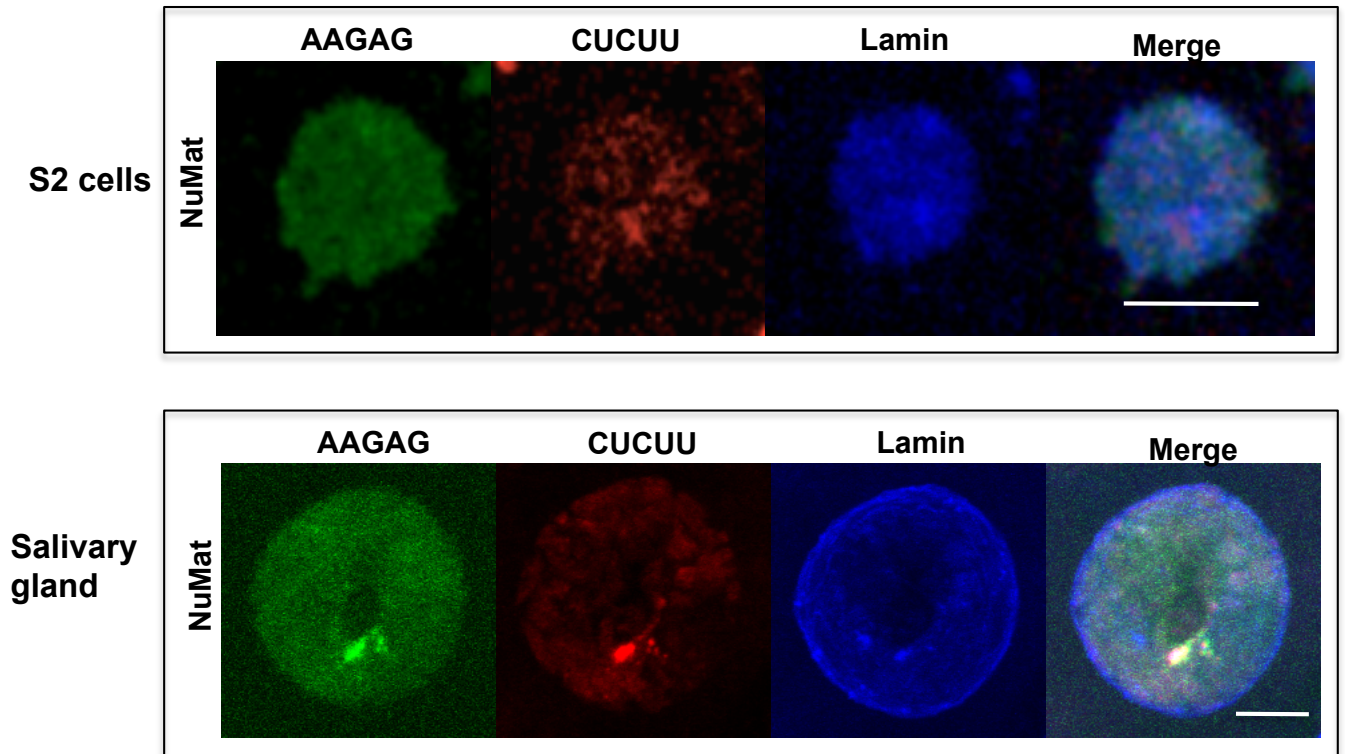

**Distribution of AAGAG/CUCUU transcripts in S2 cells and Salivary gland NuMat** – RNA-FISH shows that both the transcripts are detectable in NuMat of S2 cells and salivary gland. The transcripts are distributed differently and do not show significant overlap except for a localized region in the salivary gland nuclei (probably at the chromocenter). Scale Bar – 5  $\mu\text{m}$  for S2 cells and 10 $\mu\text{m}$  for salivary gland nuclei .
